# Supplementary material
Source: PubMed Central journal article supplement (PMC6430707)
Supplement: NIHMS1516141-supplement-1.pdf [file NIHMS1516141-supplement-1.pdf]

## **SUPPLEMENTARY INFORMATION**

### **FtsW is a peptidoglycan polymerase that is functional only in complex with its cognate penicillin-binding protein**

Atsushi Taguchi<sup>1</sup>, Michael A. Welsh<sup>1</sup>, Lindsey S. Marmont<sup>1</sup>, Wonsik Lee<sup>1,2</sup>, Megan Sjodt<sup>3</sup>, Andrew C. Kruse<sup>3</sup>, Daniel Kahne<sup>3,4</sup>, Thomas G. Bernhardt<sup>1,5\*</sup> and Suzanne Walker<sup>1,4\*</sup>

<sup>1</sup> Department of Microbiology and Immunobiology, Harvard Medical School, Boston, MA 02115, USA

<sup>2</sup> School of Pharmacy, Sungkyunkwan University, Suwon 16419, Republic of Korea

<sup>3</sup> Department of Biological Chemistry and Molecular Pharmacology, Harvard Medical School, Boston, MA 02115, USA

<sup>4</sup> Department of Chemistry and Chemical Biology, Harvard University, Cambridge, MA 02138, USA

<sup>5</sup> Howard Hughes Medical Institute, Harvard Medical School, Boston, MA 02115, USA

\* email: [suzanne\\_walker@hms.harvard.edu](mailto:suzanne_walker@hms.harvard.edu); [thomas\\_bernhardt@hms.harvard.edu](mailto:thomas_bernhardt@hms.harvard.edu)

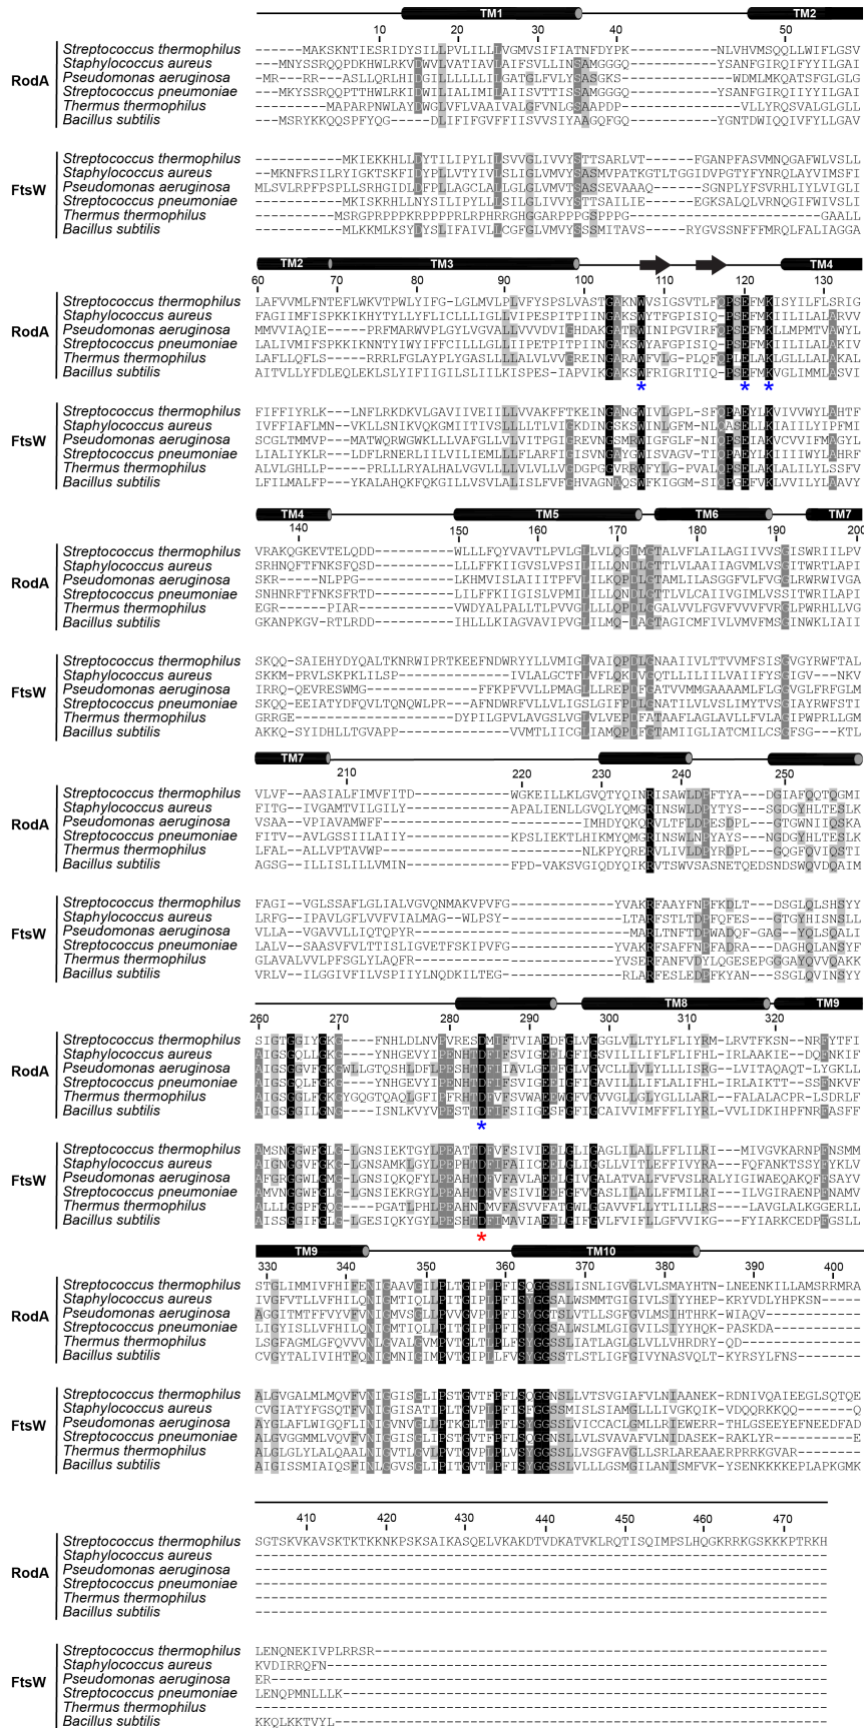

**Supplementary Figure 1:** Sequence alignment of FtsW and RodA. Sequence conservation analysis of 20 RodA sequences and 20 FtsW sequences from diverse taxa was performed as described previously.<sup>1</sup> Representative examples of RodA and FtsW from 6 species are shown. Residues with 98%, 80% and 60% identity in the 40 sequences are colored in black, gray and light gray, respectively. Secondary structure elements are shown above the alignment based on the *T. thermophilus* RodA crystal structure.<sup>1</sup> The red asterisk (\*) denotes the conserved aspartate residue mutated in this study. The blue asterisk (\*) highlights residues that were previously reported to be essential in *B. subtilis* RodA polymerase activity *in vitro*.<sup>1,2</sup>

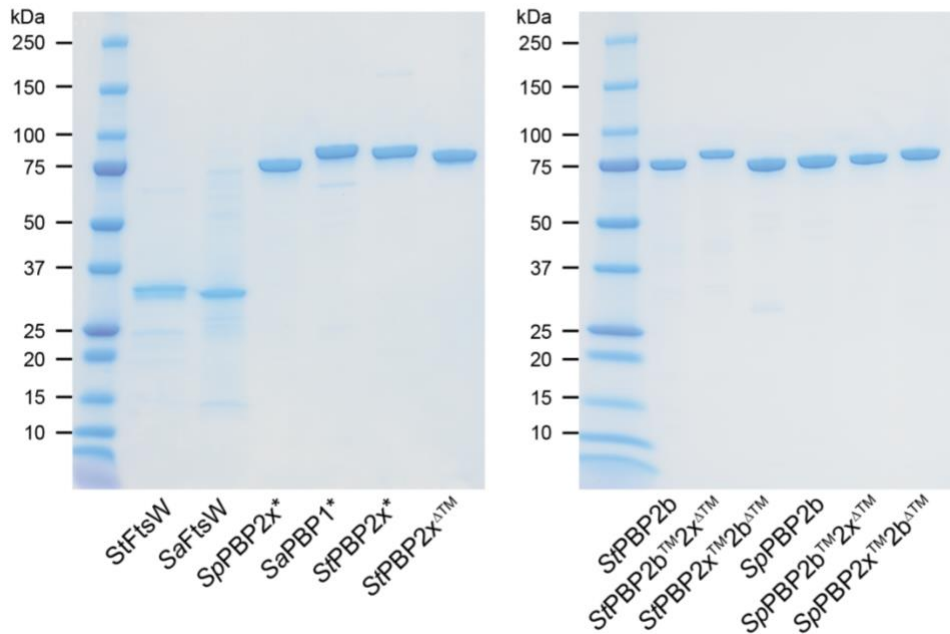

**Supplementary Figure 2:** Coomassie-stained gels of the *Staphylococcus* and *Streptococcus* FtsW and bPBPs with  $\sim 2 \mu\text{g}$  of total protein loaded per lane. Similar results were obtained three times for FtsW and two times for bPBPs.

*St* = *S. thermophilus*; *Sp* = *S. pneumoniae*; *Sa* = *S. aureus*

$SpPBP2x^* = SpPBP2x^{S337A}$ ;  $SaPBP1^* = SaPBP1^{S314A}$ ;  $StPBP2x^* = StPBP2x^{S343A}$

$StPBP2x^{\Delta TM} = StPBP2x^{G53-D755}$

$StPBP2b^{TM2x^{\Delta TM}} = StPBP2b^{M1-M58}StPBP2x^{G53-D755}$

$StPBP2x^{TM2b^{\Delta TM}} = StPBP2x^{M1-I52}StPBP2b^{Q59-H704}$

$SpPBP2b^{TM2x^{\Delta TM}} = SpPBP2b^{M6-Y38}SpPBP2x^{T50-D750}$

$SpPBP2x^{TM2b^{\Delta TM}} = SpPBP2x^{M1-G49}SpPBP2b^{M39-N685}$

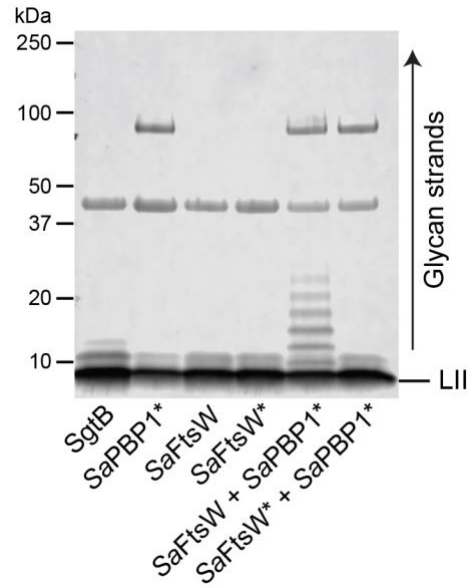

**Supplementary Figure 3:** *S. aureus* FtsW polymerizes *S. aureus* Lipid II in the presence of its cognate bPBP. *S. aureus* FtsW (2.5  $\mu$ M) or SgtB (MGT; 1  $\mu$ M) was incubated with Lipid II (10  $\mu$ M) and PBP1\* (2.5  $\mu$ M). Moenomycin (2  $\mu$ M) was added to all reactions to eliminate background polymerization by aPBPs or MGTs. The resulting polymer was labeled with BDL and detected by western blot as in Fig. 1c. Bands observed around 45 kDa and 85 kDa correspond to *E. faecalis* PBPX and *S. aureus* PBP1\*, respectively, which bind BDL. A representative blot of four independent experiments is shown. An asterisk indicates a catalytically inactive variant. FtsW\* = SaFtsW<sup>D287A</sup>; PBP1\* = SaPBP1<sup>S314A</sup>

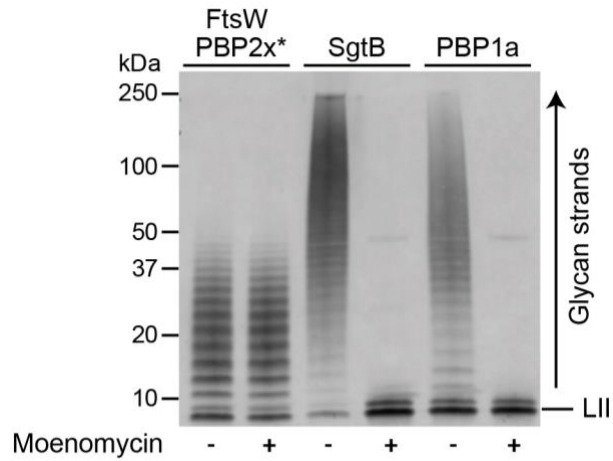

**Supplementary Figure 4:** *S. thermophilus* FtsW polymerizes *E. faecalis* Lipid II in the presence of moenomycin. *S. thermophilus* FtsW (0.5  $\mu$ M), *S. aureus* SgtB (MGT; 0.5  $\mu$ M) and *S. pneumoniae* PBP1a (aPBP; 0.5  $\mu$ M) were incubated with Lipid II (10  $\mu$ M). Moenomycin (5  $\mu$ M) was added to the indicated samples. Polymer was labeled with BDL using *Ef*PBPX and detected by western blot as in Fig 1c. A representative blot of two independent experiments is shown. An asterisk indicates a catalytically inactive variant. PBP2x\* = *St*PBP2x<sup>S343A</sup>

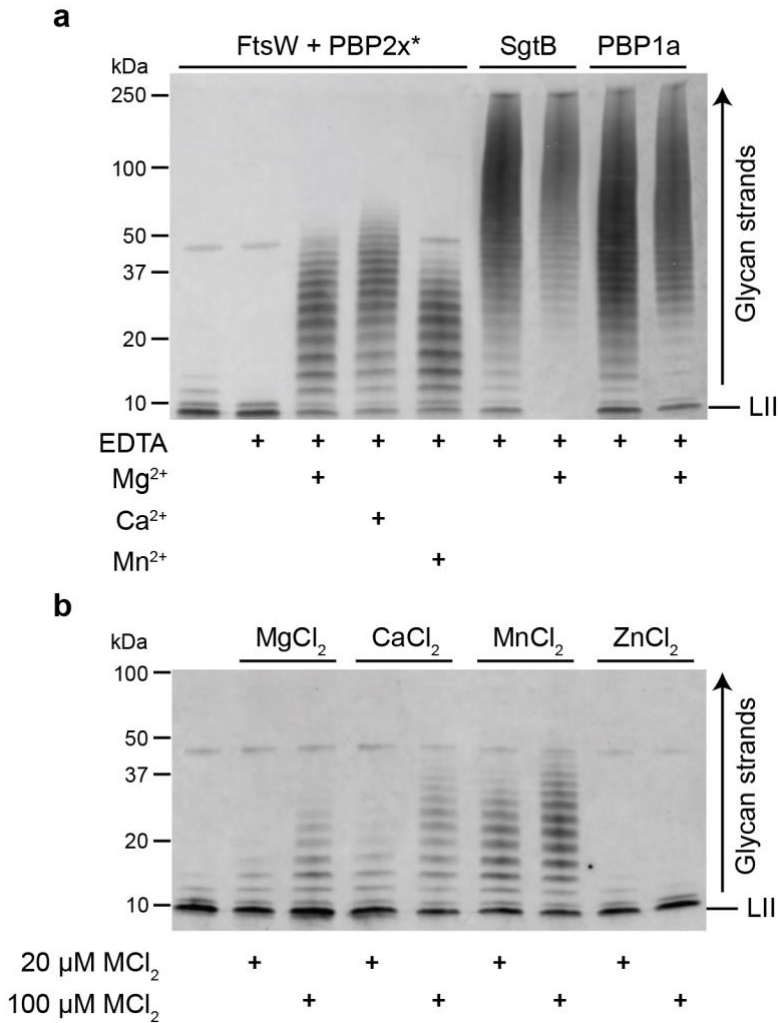

**Supplementary Figure 5:** *S. thermophilus* FtsW requires divalent cations for PGT activity. (a) *S. thermophilus* FtsW (0.5 μM) and PBP2x\* (1 μM) were combined with *E. faecalis* Lipid II (10 μM) in a reaction buffer supplemented with EDTA (10 mM) and the indicated metal chloride (12.5 mM). Analogous reactions were conducted with *S. aureus* SgtB (MGT; 0.5 μM) and *S. pneumoniae* PBP1a (aPBP; 0.5 μM). The polymer products were labeled with BDL using *Ef*PBPX and detected by western blot as in Fig. 1c. A representative blot of three independent experiments is shown. An asterisk indicates a catalytically inactive variant. PBP2x\* = *St*PBP2x<sup>S343A</sup>

(b) *E. faecalis* Lipid II (10 μM) was pre-labeled with BDL (2 mM) using *Ef*PBPX (10 μM) in a reaction buffer supplemented with EDTA (10 μM). After heat-inactivation of *Ef*PBPX, *S. thermophilus* FtsW (0.5 μM) and PBP2x (1 μM) were added to the reaction along with the indicated concentration of metal chloride (MCl<sub>2</sub>). The polymerization reaction was quenched after 15 min and the product was detected via western blot. In contrast to other cations tested, Zn<sup>2+</sup> was unable to rescue polymerase activity. A representative blot of two independent experiments is shown.

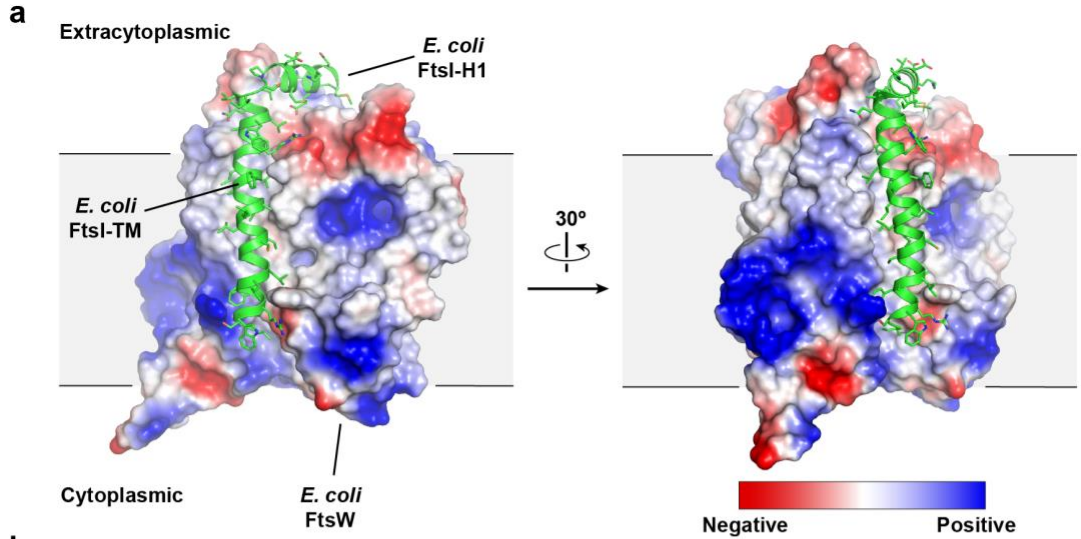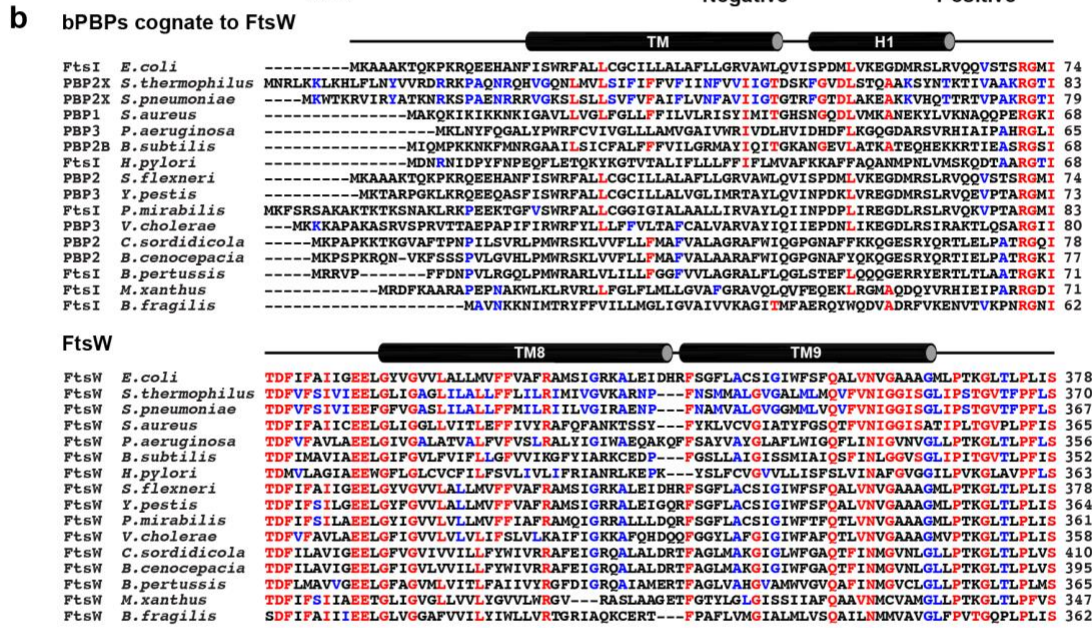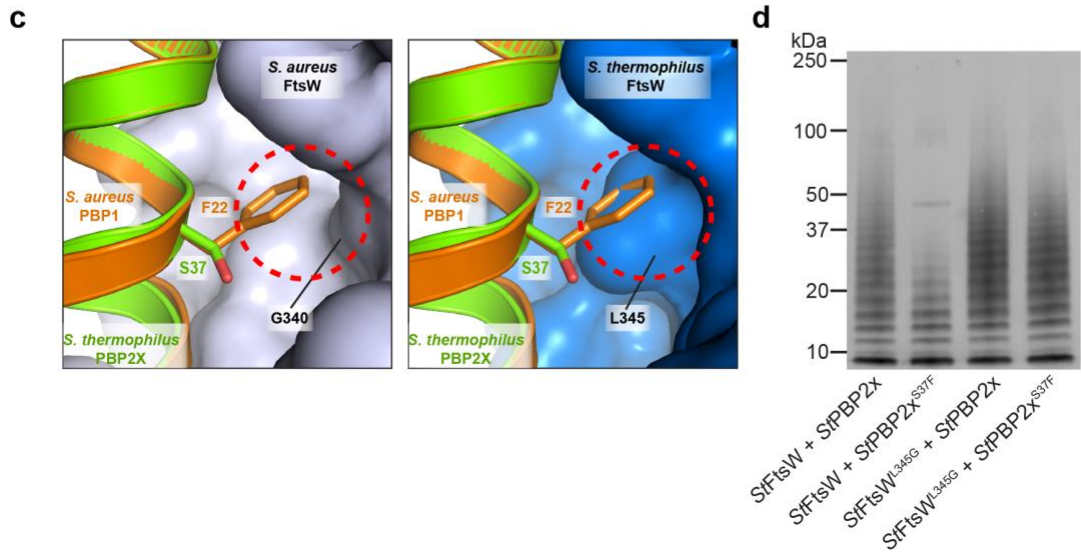



**Supplementary Figure 6:** The predicted complexes between FtsW and its cognate bPBP are largely governed by steric compatibility. (a) Predicted model of *E. coli* FtsW-FtsI (PBP3) interface based on evolutionary covariation. The TM and first alpha helix (H1) of FtsI (green) displays strong evolutionary couplings to TM8 and TM9 of FtsW. FtsW is colored according to electrostatic potential. The model is adapted from Ovchinnikov *et al.*<sup>3</sup> (b) Sequence alignment of FtsW and its cognate bPBP from diverse bacterial taxa. For clarity, only regions with strong inter-protein evolutionary covariation (TM-H1 and TM8-9 for bPBPs and FtsW, respectively) are shown. Red residues are shared by *S. thermophilus*, *S. pneumoniae* and *S. aureus* FtsW/bPBP. Blue residues are shared by *S. thermophilus* and *S. pneumoniae* FtsW/bPBP. Secondary structure prediction is based on the predicted models of *E. coli* FtsW and FtsI, and multiple sequence alignment was performed by Clustal X.<sup>3,4</sup> (c) Example of a species-specific steric compatibility at the predicted interface between FtsW and its cognate bPBP. (d) A S37F substitution in the *St*PBP2x TM helix predicted to destabilize FtsW-bPBP interaction results in the reduction of polymerase activity. A compensatory L345G substitution in *St*FtsW predicted to relieve the steric hindrance restores polymerase activity. A representative blot of two independent experiments is shown.

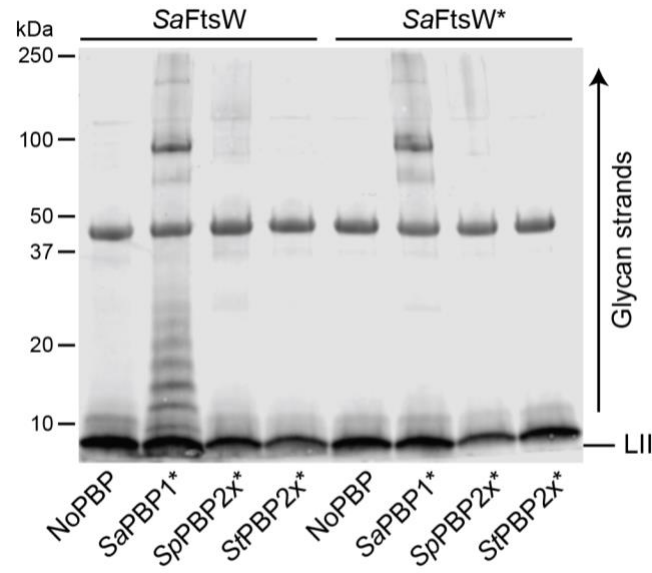

**Supplementary Figure 7:** *S. aureus* FtsW requires its cognate bPBP for PGT activity. *S. aureus* FtsW (2.5  $\mu$ M) was incubated with *S. aureus* Lipid II (10  $\mu$ M) and a bPBP from *S. aureus* (SaPBP1, 2.5  $\mu$ M), *S. pneumoniae* (SpPBP2x, 2.5  $\mu$ M) or *S. thermophilus* (StPBP2x, 2.5  $\mu$ M) in the presence of moenomycin (2  $\mu$ M). The polymer products were labeled with BDL using *Ef*PBPX and detected by western blot as in Fig. 1c. Bands observed around 45 kDa and 85 kDa correspond to self-labeling by *E. faecalis* PBPX and *S. aureus* PBP1\*, respectively. A representative blot of four independent experiments is shown. An asterisk indicates a catalytically inactive variant.

FtsW\* = SaFtsW<sup>D287A</sup>; SpPBP2x\* = SpPBP2x<sup>S337A</sup>; SaPBP1\* = SaPBP1<sup>S314A</sup>; StPBP2x\* = StPBP2x<sup>S343A</sup>

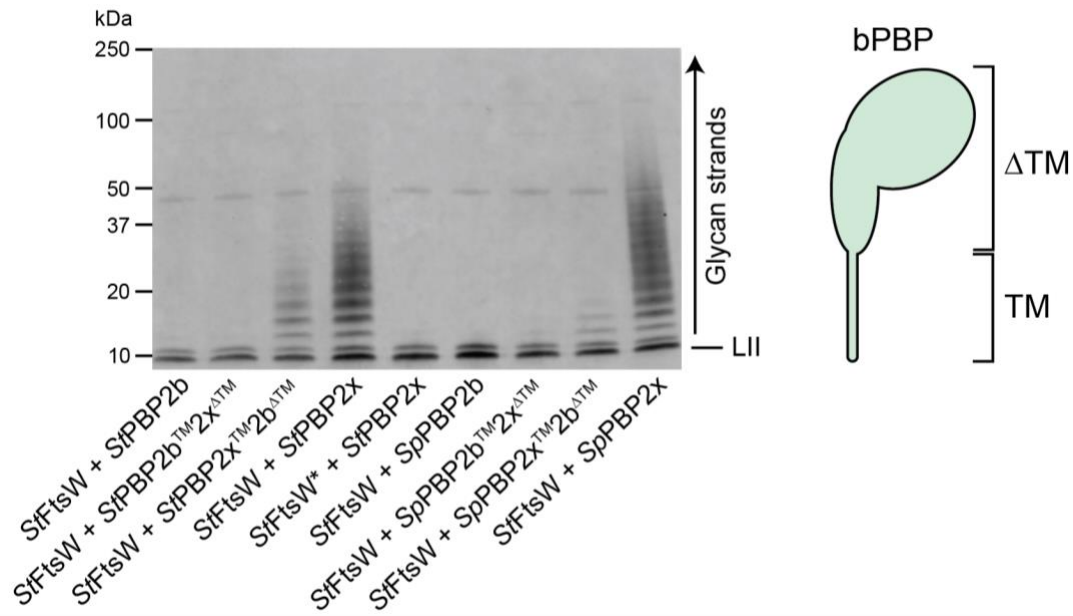

**Supplementary Figure 8:** *S. thermophilus* FtsW requires the TM helix of its cognate/near-cognate bPBP for PGT activity. *S. thermophilus* FtsW (0.5  $\mu$ M) and bPBP (1  $\mu$ M) were combined in a reaction buffer and the polymer products were detected by western blot as in Fig. 1c. A representative blot of three independent experiments is shown. *StFtsW\** = *StFtsW*<sup>D292A</sup>

$2b^{TM}2x^{\Delta TM}$  = Chimeric PBP containing the TM domain of PBP2b and the extracellular domain of PBP2x

$2x^{TM}2b^{\Delta TM}$  = Chimeric PBP containing the TM domain of PBP2x and the extracellular domain of PBP2b

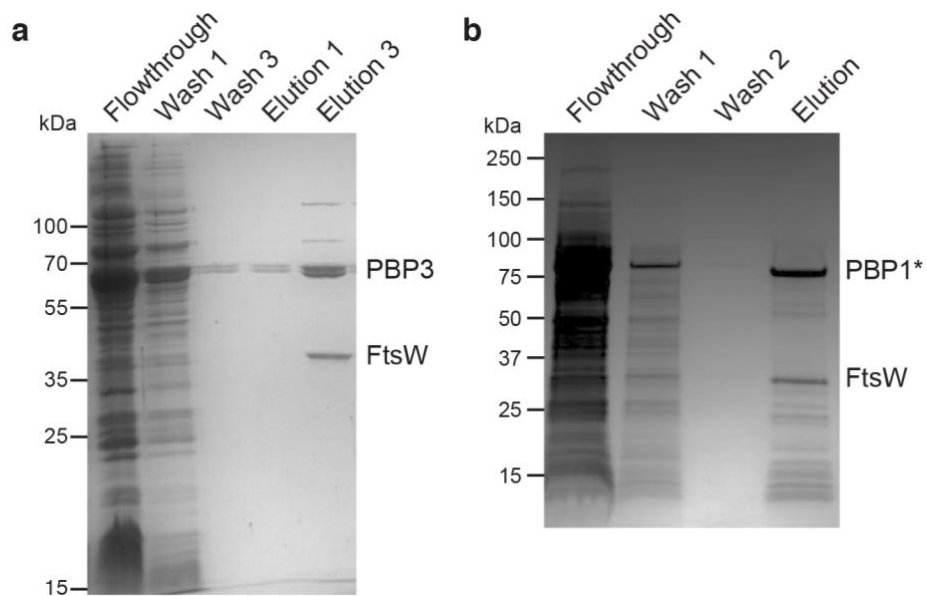

**Supplementary Figure 9:** Active FtsW-bPBP complexes can be co-purified. Coomassie staining shows the co-expression and purification of (a) *P. aeruginosa* FtsW and PBP3 and (b) *S. aureus* FtsW and PBP1\* (see methods). Representative gels of two independent purifications are shown. Identity of the proteins was assigned by western blot. Note that *Pa*PBP3 purifies as a doublet of bands that both bind Bocillin-FL. The doublet may result from C-terminal processing as has been observed for *E. coli* PBP3.<sup>5</sup> PBP1\* = *Sa*PBP1<sup>S314A</sup>

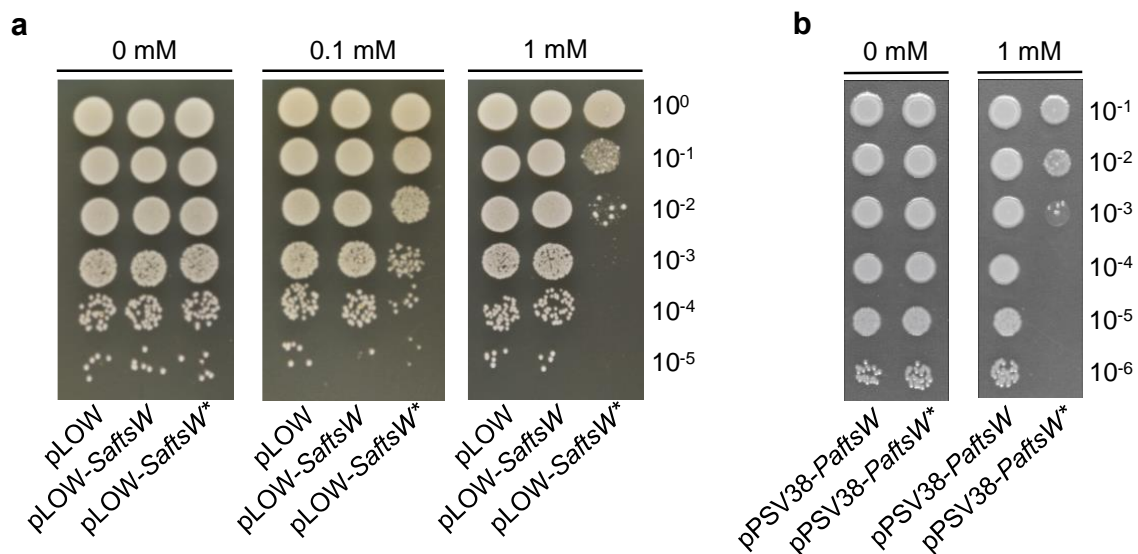

**Supplementary Figure 10:** Overexpression of FtsW\* causes impaired fitness. (a) *S. aureus* cultures in mid-log phase were normalized to  $OD_{600} = 0.2$  and serially diluted before 5  $\mu$ L of each sample was spotted on TSB plates containing erythromycin supplemented with the indicated concentration of IPTG. (b) *P. aeruginosa* overnight cultures were normalized to  $OD_{600} = 2.4$  and serially diluted before 5  $\mu$ L of each sample was spotted on LB plates containing gentamycin supplemented with the indicated concentration of IPTG. Representative results of two independent experiments are shown for both *S. aureus* and *P. aeruginosa*. An asterisk indicates a gene encoding a catalytically inactive variant. *SaftsW\** = *SaftsW*<sup>D287A</sup>; *PaftsW\** = *PaftsW*<sup>D275A</sup>

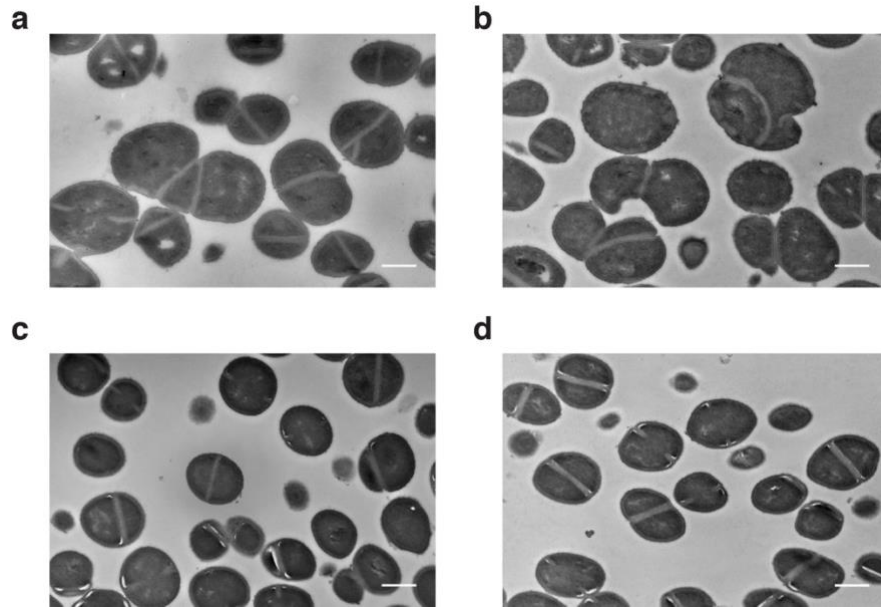

**Supplementary Figure 11:** Representative electron microscopy images of *S. aureus* strains from two independent experiments. Cells overexpressing FtsW\* revealed aberrant morphology (a & b). Images of cells (strain AT196) lacking inducer (c) and cells (strain AT195) overexpressing wild-type FtsW (d) are shown for comparison. Scale bar = 500 nm. See Supplementary Table 3 for strain genotypes.

*S. pneumoniae*  $\Delta ftsW$  P<sub>Zn</sub>-*SpftsW*

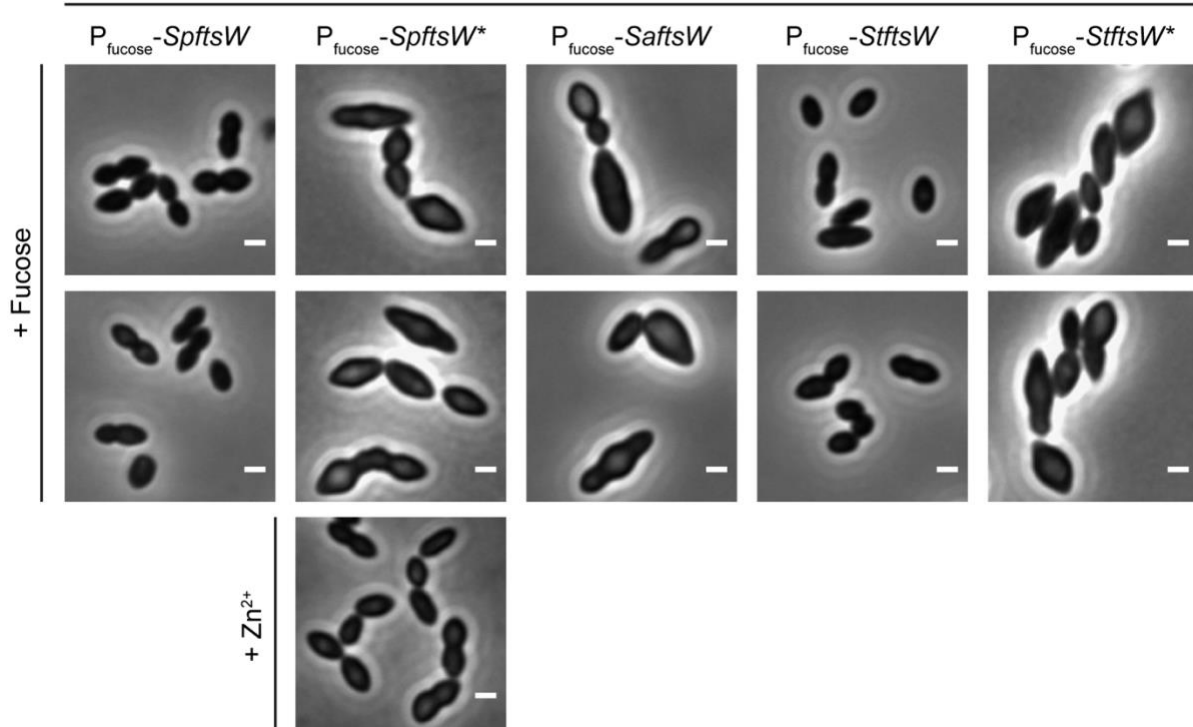

**Supplementary Figure 12:** Phase contrast images of *S. pneumoniae* strains in the presence of the indicated inducer. Representative images of two independent experiments are shown. Scale bar = 1  $\mu$ m.

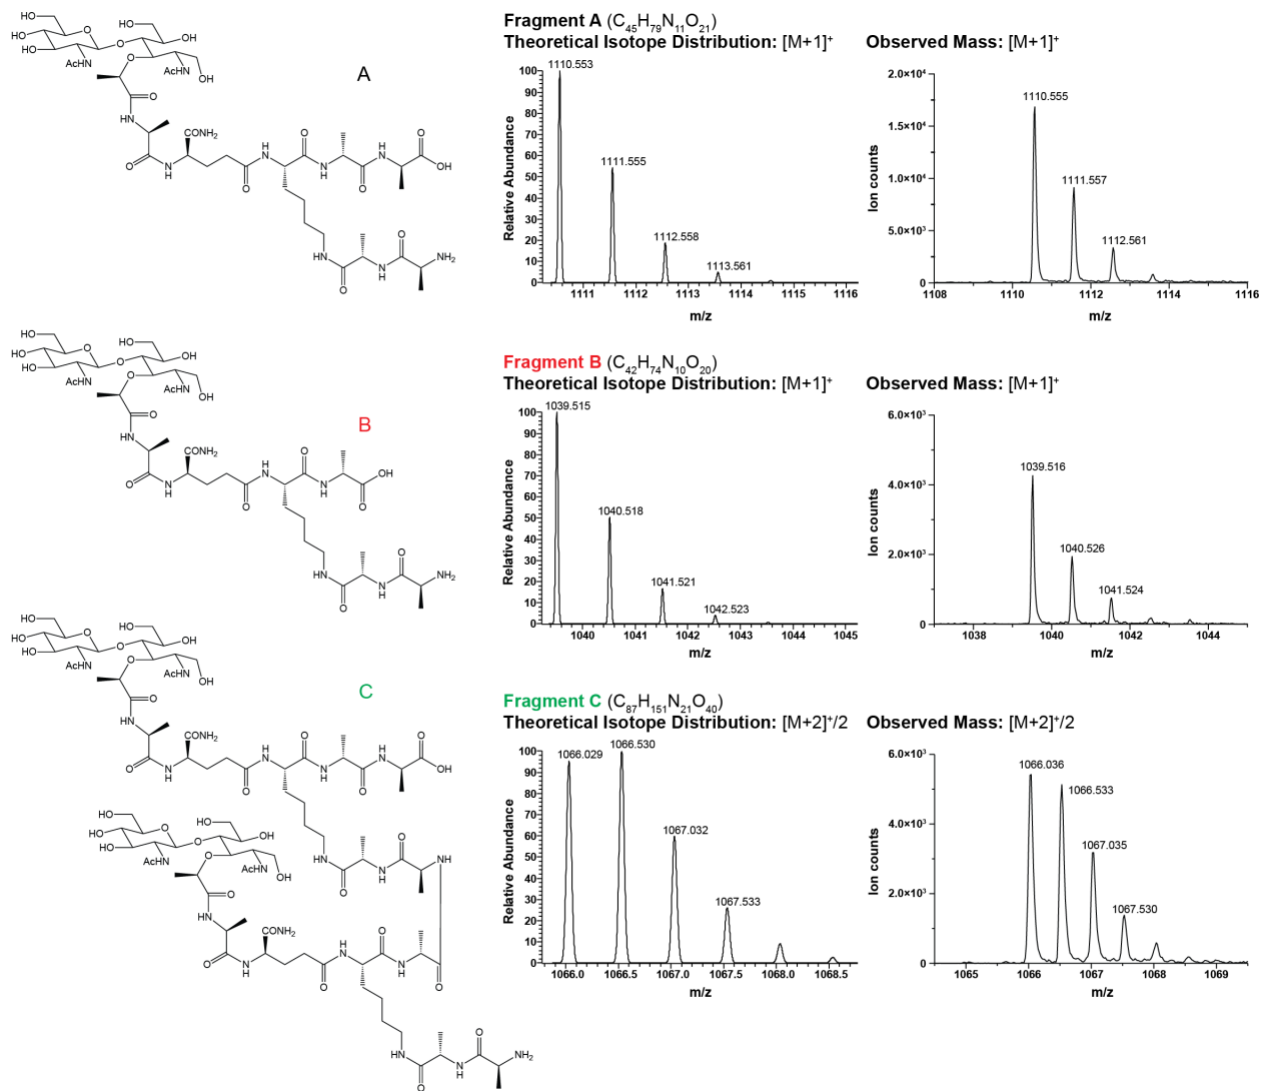

**Supplementary Figure 13:** Chemical structures and mass spectra of the mucopeptide products of *S. thermophilus* bBPB crosslinking reactions following mutanolysin digestion and reduction. Representative mass spectra of five independent experiments are shown.



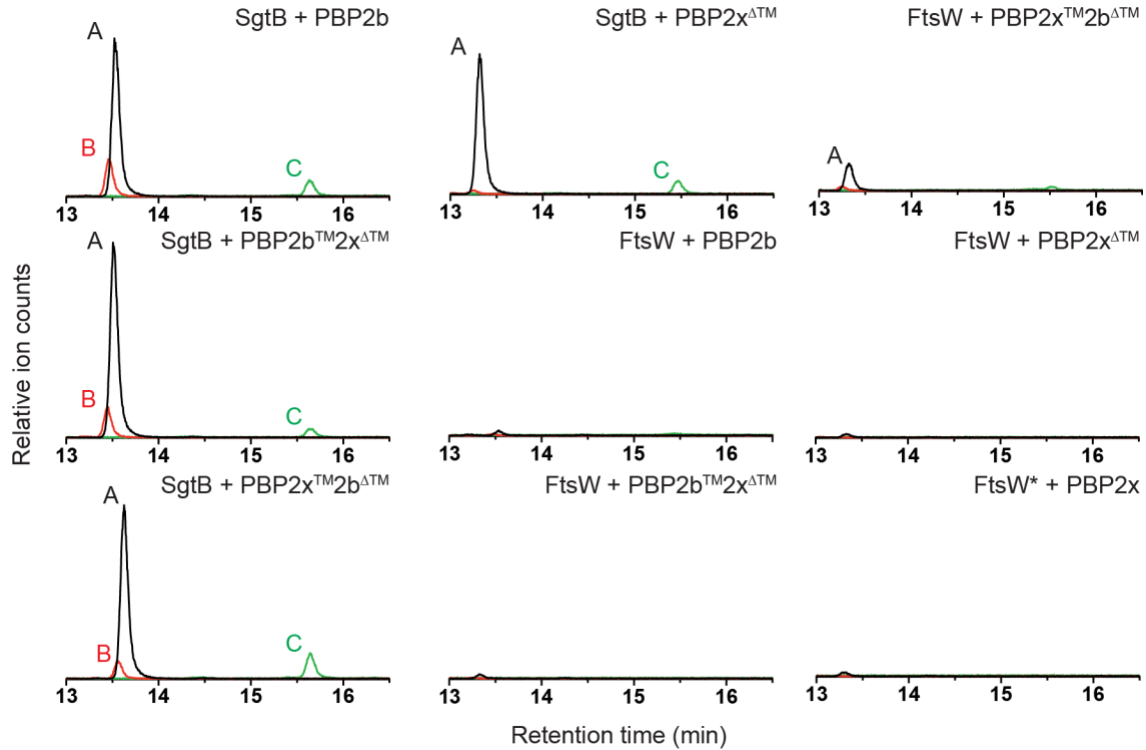

**Supplementary Figure 14:** *S. thermophilus* bPBPs do not require their native TM domain for crosslinking peptidoglycan. SgtB (1  $\mu$ M) or *S. thermophilus* FtsW (0.5  $\mu$ M) was incubated with *S. thermophilus* bPBP (1.25  $\mu$ M) in a reaction buffer containing *E. faecalis* Lipid II (20  $\mu$ M). The resulting polymer was digested with mutanolysin and analyzed by LC-MS as in Fig 3a. Crosslinking is detected by the appearance of peak C, a crosslinked muropeptide. Representative chromatograms of two independent experiments are shown.

$\text{PBP2b}^{\text{TM2x}^{\Delta\text{TM}}} = \text{StPBP2b}^{\text{M1-M58}}\text{StPBP2x}^{\text{G53-D755}}$

$\text{PBP2x}^{\text{TM2b}^{\Delta\text{TM}}} = \text{StPBP2x}^{\text{M1-I52}}\text{StPBP2b}^{\text{Q59-H704}}$

$\text{PBP2x}^{\Delta\text{TM}} = \text{StPBP2x}^{\text{G53-D755}}$

$\text{FtsW}^* = \text{StFtsW}^{\text{D292A}}$

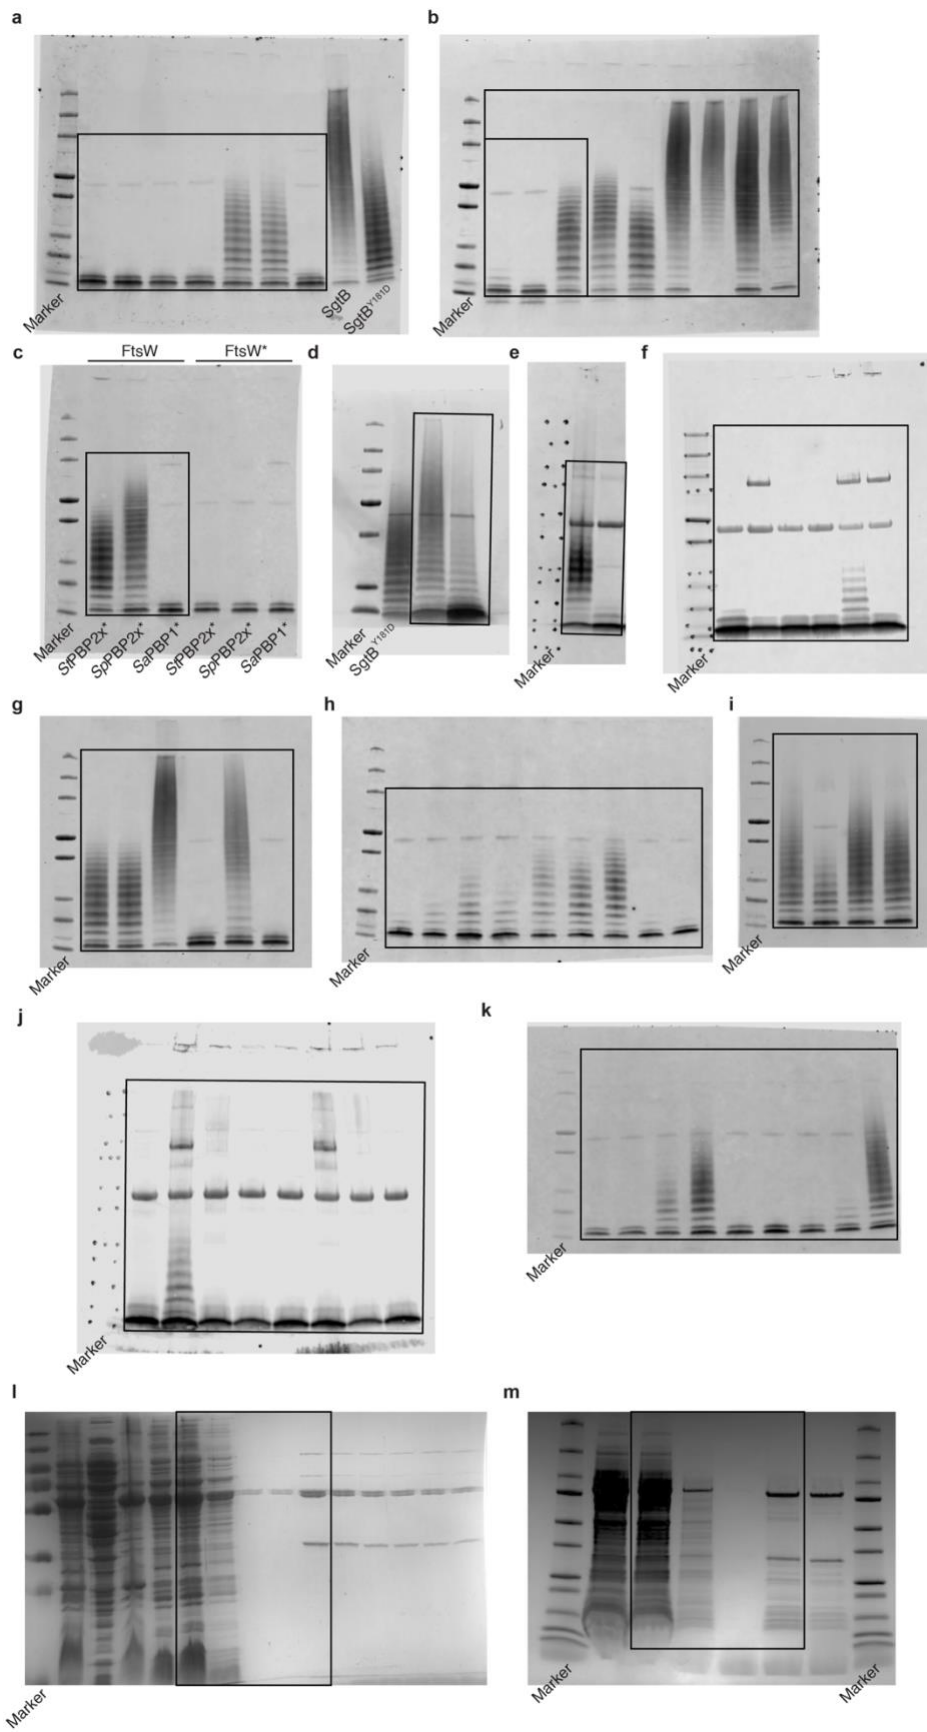

**Supplementary Figure 15:** Full membrane and gel images from Fig. 1d (a), Fig. 1e and Supplementary Fig. 5 (b), Fig. 1f (c), Fig. 2a (d), Fig 2b (e), Supplementary Fig. 3 (f), Supplementary Fig. 4 (g), Supplementary Fig. 5b (h), Supplementary Fig. 6d (i), Supplementary Fig. 7 (j), Supplementary Fig. 8 (k), Supplementary Fig. 9a (l) and Supplementary Fig. 9b (m). Black boxes indicate the cropped region for each figure.

| <i>S. aureus</i>        | % of cells with septal defects (# of cells) |
|-------------------------|---------------------------------------------|
| WT No inducer (245)     | 0 % (0)                                     |
| WT + 1 mM IPTG (234)    | 0 % (0)                                     |
| D287A No inducer (203)  | 0 % (0)                                     |
| D287A + 1 mM IPTG (212) | ~19 % (40)                                  |

**Supplementary Table 1:** Only *S. aureus* cells overexpressing FtsW\* displayed aberrant septal formation. Every cell in the electron micrograph field was analyzed for septum formation defects. The total number of cells analyzed is shown in parenthesis.

| <i>P. aeruginosa</i>    | Cell length (μm) | Cell width (μm) |
|-------------------------|------------------|-----------------|
| WT No inducer (295)     | 3.55 ± 0.75      | 1.02 ± 0.09     |
| WT + 1 mM IPTG (181)    | 3.65 ± 0.70      | 1.01 ± 0.05     |
| D275A No inducer (380)  | 3.65 ± 0.71      | 1.02 ± 0.04     |
| D275A + 1 mM IPTG (183) | 11.54 ± 4.79     | 0.91 ± 0.11     |

**Supplementary Table 2:** Measurement of the cell length and width of *P. aeruginosa* samples (Mean ± SD, Oufiti).<sup>6</sup> Cells overexpressing FtsW\* displayed a statistically significant difference in cell length compared to other samples ( $p < 0.0001$ , one-way ANOVA with Bonferroni's post hoc test, GraphPad Prism 7.0). The total number of cells measured is shown in parenthesis.

**Supplementary Table 3. Bacterial strains used in this study**

| <b>Strain</b>        | <b>Description*</b>                                                                                                                                                                                                                                                 | <b>Reference</b> |
|----------------------|---------------------------------------------------------------------------------------------------------------------------------------------------------------------------------------------------------------------------------------------------------------------|------------------|
| <i>E. coli</i>       |                                                                                                                                                                                                                                                                     |                  |
| XL1-Blue             | Host strain for plasmid cloning                                                                                                                                                                                                                                     | Stratagene       |
| DH5 $\alpha$         | Host strain for plasmid cloning                                                                                                                                                                                                                                     | Invitrogen       |
| BL21(DE3)            | Expression strain for protein production                                                                                                                                                                                                                            | 7                |
| C43(DE3)             | BL21(DE3) derivative strain for protein production                                                                                                                                                                                                                  | 8                |
| CAM333               | C43(DE3) $\Delta$ <i>ponB</i> , $\Delta$ <i>pbpC</i> , $\Delta$ <i>mtgA</i>                                                                                                                                                                                         | 2                |
| <i>S. aureus</i>     |                                                                                                                                                                                                                                                                     |                  |
| RN4220               | Wild-type                                                                                                                                                                                                                                                           | 9                |
| AT194                | RN4220 pLOW; Erm <sup>R</sup>                                                                                                                                                                                                                                       | This study       |
| AT195                | RN4220 pLOW- <i>SaftsW</i> ; Erm <sup>R</sup>                                                                                                                                                                                                                       | This study       |
| AT196                | RN4220 pLOW- <i>SaftsW</i> <sup>D287A</sup> ; Erm <sup>R</sup>                                                                                                                                                                                                      | This study       |
| <i>P. aeruginosa</i> |                                                                                                                                                                                                                                                                     |                  |
| PAO1                 | Wild-type                                                                                                                                                                                                                                                           | C.S. Harwood     |
| LSM7                 | PAO1 pPSV38- <i>PaftsW</i> ; Gent <sup>R</sup>                                                                                                                                                                                                                      | This study       |
| LSM8                 | PAO1 pPSV38- <i>PaftsW</i> <sup>D275A</sup> ; Gent <sup>R</sup>                                                                                                                                                                                                     | This study       |
| <i>S. pneumoniae</i> |                                                                                                                                                                                                                                                                     |                  |
| D39                  | $\Delta$ <i>cps</i>                                                                                                                                                                                                                                                 | 10               |
| AT030                | D39 $\Delta$ <i>cps</i> , $\Delta$ <i>bgaA::erm</i> ; Erm <sup>R</sup>                                                                                                                                                                                              | 11               |
| AT031                | D39 $\Delta$ <i>cps</i> , $\Delta$ <i>bgaA::kan</i> ; Kan <sup>R</sup>                                                                                                                                                                                              | 11               |
| R6                   | Wild-type                                                                                                                                                                                                                                                           | 10               |
| AT202                | R6 <i>cpsO::</i> (P <sub>zn</sub> - <i>SpftsW</i> , <i>kan</i> ):: <i>cpsN</i> ; Kan <sup>R</sup>                                                                                                                                                                   | This study       |
| AT203                | R6 <i>cpsO::</i> (P <sub>zn</sub> - <i>SpftsW</i> , <i>kan</i> ):: <i>cpsN</i> , $\Delta$ <i>ftsW::erm</i> ; Erm <sup>R</sup> , Kan <sup>R</sup>                                                                                                                    | This study       |
| AT204                | R6 <i>cpsO::</i> (P <sub>zn</sub> - <i>SpftsW</i> , <i>kan</i> ):: <i>cpsN</i> , $\Delta$ <i>ftsW::erm</i> ,<br>$\Delta$ <i>bgaA::</i> (P <sub>fucose</sub> - <i>SpftsW</i> , <i>tet</i> ); Erm <sup>R</sup> , Kan <sup>R</sup> , Tet <sup>R</sup>                  | This study       |
| AT205                | R6 <i>cpsO::</i> (P <sub>zn</sub> - <i>SpftsW</i> , <i>kan</i> ):: <i>cpsN</i> , $\Delta$ <i>ftsW::erm</i> ,<br>$\Delta$ <i>bgaA::</i> (P <sub>fucose</sub> - <i>SpftsW</i> <sup>D289A</sup> , <i>tet</i> ); Erm <sup>R</sup> , Kan <sup>R</sup> , Tet <sup>R</sup> | This study       |
| AT206                | R6 <i>cpsO::</i> (P <sub>zn</sub> - <i>SpftsW</i> , <i>kan</i> ):: <i>cpsN</i> , $\Delta$ <i>ftsW::erm</i> ,<br>$\Delta$ <i>bgaA::</i> (P <sub>fucose</sub> - <i>SaftsW</i> , <i>tet</i> ); Erm <sup>R</sup> , Kan <sup>R</sup> , Tet <sup>R</sup>                  | This study       |
| AT207                | R6 <i>cpsO::</i> (P <sub>zn</sub> - <i>SpftsW</i> , <i>kan</i> ):: <i>cpsN</i> , $\Delta$ <i>ftsW::erm</i> ,<br>$\Delta$ <i>bgaA::</i> (P <sub>fucose</sub> - <i>StftsW</i> , <i>tet</i> ); Erm <sup>R</sup> , Kan <sup>R</sup> , Tet <sup>R</sup>                  | This study       |
| AT208                | R6 <i>cpsO::</i> (P <sub>zn</sub> - <i>SpftsW</i> , <i>kan</i> ):: <i>cpsN</i> , $\Delta$ <i>ftsW::erm</i> ,<br>$\Delta$ <i>bgaA::</i> (P <sub>fucose</sub> - <i>StftsW</i> <sup>D292A</sup> , <i>tet</i> ); Erm <sup>R</sup> , Kan <sup>R</sup> , Tet <sup>R</sup> | This study       |

\* See Supplementary Table 4 for list of abbreviations

**Supplementary Table 4. Plasmids used in this study**

| <b>Plasmid</b>  | <b>Description*</b>                                                                                                                                                    | <b>Reference</b> |
|-----------------|------------------------------------------------------------------------------------------------------------------------------------------------------------------------|------------------|
| pET28b(+)       | IPTG-inducible protein expression vector; Kan <sup>R</sup>                                                                                                             | Novagen          |
| pATPL107        | His <sub>6</sub> - <i>StFtsW</i> expression vector; Kan <sup>R</sup>                                                                                                   | This study       |
| pATPL121        | His <sub>6</sub> - <i>StFtsW</i> <sup>D292A</sup> expression vector; Kan <sup>R</sup>                                                                                  | This study       |
| pATPL185        | His <sub>6</sub> - <i>StFtsW</i> <sup>L345G</sup> expression vector; Kan <sup>R</sup>                                                                                  | This study       |
| pMW2179         | His <sub>6</sub> - <i>SaFtsW</i> expression vector; Kan <sup>R</sup>                                                                                                   | This study       |
| pMW2193         | His <sub>6</sub> - <i>SaFtsW</i> <sup>D287A</sup> expression vector; Kan <sup>R</sup>                                                                                  | This study       |
| pMW2194         | <i>SaPBP1</i> -His <sub>6</sub> expression vector; Kan <sup>R</sup>                                                                                                    | This study       |
| pMW2180         | <i>SaPBP1</i> <sup>S314A</sup> -His <sub>6</sub> expression vector; Kan <sup>R</sup>                                                                                   | This study       |
| pET22b(+)       | IPTG-inducible protein expression vector; Carb <sup>R</sup>                                                                                                            | Novagen          |
| pATPL091        | <i>StPBP2x</i> -His <sub>6</sub> expression vector; Carb <sup>R</sup>                                                                                                  | This study       |
| pATPL123        | <i>StPBP2x</i> <sup>G53-D755</sup> -His <sub>6</sub> expression vector; Carb <sup>R</sup>                                                                              | This study       |
| pATPL112        | <i>StPBP2x</i> <sup>S343A</sup> -His <sub>6</sub> expression vector; Carb <sup>R</sup>                                                                                 | This study       |
| pATPL180        | <i>StPBP2x</i> <sup>S37F</sup> -His <sub>6</sub> expression vector; Carb <sup>R</sup>                                                                                  | This study       |
| pATPL169        | <i>StPBP2b</i> -His <sub>6</sub> expression vector; Carb <sup>R</sup>                                                                                                  | This study       |
| pATPL172        | <i>StPBP2b</i> <sup>M1-M58</sup> <i>StPBP2x</i> <sup>G53-D755</sup> -His <sub>6</sub> expression vector; Carb <sup>R</sup>                                             | This study       |
| pATPL173        | <i>StPBP2x</i> <sup>M1-152</sup> <i>StPBP2b</i> <sup>Q59-H704</sup> -His <sub>6</sub> expression vector; Carb <sup>R</sup>                                             | This study       |
| pATPL017        | <i>SpPBP2x</i> -His <sub>6</sub> expression vector; Carb <sup>R</sup>                                                                                                  | This study       |
| pATPL067        | <i>SpPBP2x</i> <sup>S337A</sup> -His <sub>6</sub> expression vector; Carb <sup>R</sup>                                                                                 | This study       |
| pATPL084        | <i>SpPBP2b</i> -His <sub>6</sub> expression vector; Carb <sup>R</sup>                                                                                                  | This study       |
| pATPL170        | <i>SpPBP2b</i> <sup>M6-Y38</sup> <i>SpPBP2x</i> <sup>T50-D750</sup> -His <sub>6</sub> expression vector; Carb <sup>R</sup>                                             | This study       |
| pATPL171        | <i>SpPBP2x</i> <sup>M1-G49</sup> <i>SpPBP2b</i> <sup>M39-N685</sup> -His <sub>6</sub> expression vector; Carb <sup>R</sup>                                             | This study       |
| pATPL044        | <i>SpPBP1a</i> -His <sub>6</sub> expression vector; Carb <sup>R</sup>                                                                                                  | This study       |
| pATPL051        | <i>SpPBP1a</i> <sup>S370A</sup> -His <sub>6</sub> expression vector; Carb <sup>R</sup>                                                                                 | This study       |
| pETDuet-1       | IPTG-inducible protein expression vector containing two multiple cloning sites; Carb <sup>R</sup>                                                                      | Novagen          |
| pETDuet-FLAG    | Modified pETDuet-1 containing a N-terminal His <sub>6</sub> -SUMO-FLAG tag at the first site and C-terminal His <sub>6</sub> tag at the second site; Carb <sup>R</sup> | This study       |
| pLSM3           | His <sub>6</sub> -SUMO-FLAG- <i>PaFtsW</i> & <i>PaPBP3</i> -His <sub>6</sub> expression vector; Carb <sup>R</sup>                                                      | This study       |
| pLSM6           | His <sub>6</sub> -SUMO-FLAG- <i>PaFtsW</i> <sup>D275A</sup> & <i>PaPBP3</i> -His <sub>6</sub> expression vector; Carb <sup>R</sup>                                     | This study       |
| pMW2144         | His <sub>6</sub> -SUMO-FLAG- <i>SaFtsW</i> & <i>SaPBP1</i> <sup>S314A</sup> -His <sub>6</sub> expression vector; Carb <sup>R</sup>                                     | This study       |
| pMW2176         | His <sub>6</sub> -SUMO-FLAG- <i>SaFtsW</i> <sup>D287A</sup> & <i>SaPBP1</i> <sup>S314A</sup> -His <sub>6</sub> expression vector; Carb <sup>R</sup>                    | This study       |
| pAM174          | Encodes arabinose-inducible Ulp1 <sup>L403-K621</sup> protease; Cm <sup>R</sup>                                                                                        | 2                |
| pMW1010         | <i>E. faecalis</i> His <sub>6</sub> -PBPX expression vector; Kan <sup>R</sup>                                                                                          | 12               |
| pPBP4           | <i>S. aureus</i> His <sub>6</sub> -PBP4 expression vector; Kan <sup>R</sup>                                                                                            | 13               |
| pMgt1           | <i>S. aureus</i> SgtB-His <sub>6</sub> expression vector; Carb <sup>R</sup>                                                                                            | 14               |
| pET24bSgtBY181D | <i>S. aureus</i> SgtB <sup>Y181D</sup> -His <sub>6</sub> expression vector; Kan <sup>R</sup>                                                                           | 15               |
| pLOW            | <i>S. aureus</i> expression vector containing IPTG-inducible P <sub>spac</sub> promoter; Erm <sup>R</sup>                                                              | 16               |
| pLOWftsW        | <i>S. aureus</i> P <sub>spac</sub> - <i>SaFtsW</i> expression vector; Erm <sup>R</sup>                                                                                 | This study       |
| pLOWftsWD287A   | <i>S. aureus</i> P <sub>spac</sub> - <i>SaFtsW</i> <sup>D287A</sup> expression vector; Erm <sup>R</sup>                                                                | This study       |

\*Abbreviations: Carb<sup>R</sup>, ampicillin/carbenicillin resistance; Cm<sup>R</sup>, chloramphenicol resistance; Erm<sup>R</sup>, erythromycin resistance; Gent<sup>R</sup>, gentamycin resistance; Kan<sup>R</sup>, kanamycin resistance; Tet<sup>R</sup>, tetracycline resistance

**Supplementary Table 4. Plasmids used in this study (cont.)**

| <b>Plasmid</b> | <b>Description*</b>                                                                                                                                 | <b>Reference</b> |
|----------------|-----------------------------------------------------------------------------------------------------------------------------------------------------|------------------|
| pPSV38         | <i>P. aeruginosa</i> expression vector containing IPTG-inducible $P_{lacUV5}$ promoter; Gent <sup>R</sup>                                           | 17               |
| pLSM8          | <i>P. aeruginosa</i> $P_{lacUV5}$ - <i>PaFtsW</i> expression vector; Gent <sup>R</sup>                                                              | This study       |
| pLSM9          | <i>P. aeruginosa</i> $P_{lacUV5}$ - <i>PaFtsW</i> <sup>D275A</sup> expression vector; Gent <sup>R</sup>                                             | This study       |
| pLEM023        | <i>S. pneumoniae bgaA</i> integration vector containing zinc-inducible $P_{czc}$ ( $P_{zn}$ ) promoter; Carb <sup>R</sup> , Tet <sup>R</sup>        | 11               |
| pATPL139       | <i>S. pneumoniae bgaA</i> :: $P_{zn}$ - <i>SpFtsW</i> integration vector; Carb <sup>R</sup> , Tet <sup>R</sup>                                      | This study       |
| pAKF205        | <i>S. pneumoniae bgaA</i> integration vector containing fucose-inducible $P_{fcsK}$ ( $P_{fucose}$ ) promoter; Carb <sup>R</sup> , Tet <sup>R</sup> | 11               |
| pATPL137       | <i>S. pneumoniae bgaA</i> :: $P_{fucose}$ - <i>SpFtsW</i> integration vector; Carb <sup>R</sup> , Tet <sup>R</sup>                                  | This study       |
| pATPL138       | <i>S. pneumoniae bgaA</i> :: $P_{fucose}$ - <i>SpFtsW</i> <sup>D289A</sup> integration vector; Carb <sup>R</sup> , Tet <sup>R</sup>                 | This study       |
| pATPL141       | <i>S. pneumoniae bgaA</i> :: $P_{fucose}$ - <i>SaFtsW</i> integration vector; Carb <sup>R</sup> , Tet <sup>R</sup>                                  | This study       |
| pATPL142       | <i>S. pneumoniae bgaA</i> :: $P_{fucose}$ - <i>StFtsW</i> integration vector; Carb <sup>R</sup> , Tet <sup>R</sup>                                  | This study       |
| pATPL143       | <i>S. pneumoniae bgaA</i> :: $P_{fucose}$ - <i>StFtsW</i> <sup>D292A</sup> integration vector; Carb <sup>R</sup> , Tet <sup>R</sup>                 | This study       |

\*Abbreviations: Carb<sup>R</sup>, ampicillin/carbenicillin resistance; Cm<sup>R</sup>, chloramphenicol resistance; Erm<sup>R</sup>, erythromycin resistance; Gent<sup>R</sup>, gentamycin resistance; Kan<sup>R</sup>, kanamycin resistance; Tet<sup>R</sup>, tetracycline resistance



**Supplementary Table 5. Oligonucleotide primers used in this study**

| <b>Primer</b> | <b>Sequence (5'-3')*</b>                                  |
|---------------|-----------------------------------------------------------|
| oAT01         | GTAC <u>CATATG</u> AAAATTGAAAAGAAACATCTTTTGG              |
| oAT02         | ACTA <u>AAGCTT</u> CTAACGACTTCTTCTCAAAGGTA                |
| oAT03         | CCTTTGTGTTTTCAATTGTTATTGAAGAGTT                           |
| oAT04         | CTGTTGTTGCTTCTGGGAGATAAC                                  |
| oAT05         | TCTCATGGGGATGCAAGTTTTTGTTAATATCGGTG                       |
| oAT06         | TGCATCCCCATGAGAGCCCCACACC                                 |
| oAT07         | GTAC <u>CATATG</u> AACAGACTTAAAAAACTTAAACAT               |
| oAT08         | ACTA <u>AAGCTT</u> GTCTCCTAAAGTAATGGTAATCTT               |
| oAT09         | GTAC <u>CATATG</u> GGAACCGATAGTAAGTTTGGTGTG               |
| oAT10         | AGCCAGGGGCAACCATGAAAAGTGATGCTCTTGT                        |
| oAT11         | TGGTTGCCCTGGCTCATACTGAGCTTCA                              |
| oAT12         | TATTTTTATCTTTTTTGTTTTTATTATCAAC                           |
| oAT13         | AAGAGAACCATCAGGTTCTG                                      |
| oAT14         | GTAC <u>CATATG</u> ACATCATTGTTGGGAAAAAATAGTCAA            |
| oAT15         | ACTA <u>AAGCTT</u> GTGAGTATTTGATAAAGTTCCATGATAG           |
| oAT16         | CATATAGGTCAAACGCGCAAAA                                    |
| oAT17         | TTTTGCGGTTTGACCTATATGGGAACCGATAGTAAGTTTGGTGTG             |
| oAT18         | AATAATTACCACAAAGTTGATAATAAAA                              |
| oAT19         | TTTTATTATCAACTTTGTGGTAATTATTCAGGTTTATAACAAATCTTTTTATACTAA |
| oAT20         | GTAG <u>CTAGC</u> ACTGAATATATGAAGAATTTTAGAAGTATTTTACGG    |
| oAT21         | ACTG <u>CGGCCG</u> CTTAATTAAATTGTCTTCTTATATCAACTTTTTGTTG  |
| oAT22         | ACCACATACAGCATTATTTTTGCAATTATTTG                          |
| oAT23         | TCTGGTAAATAGCCCAATTC                                      |
| oAT24         | AGGAGATATACCATGGGCAAGCAAAAAATTTAAATTTAAAAAA               |
| oAT25         | TGCTCGAGTGCGGCCGCTCCGACTTATCCTTGTC                        |
| oAT26         | CGAGCCTGGAGCAACATTTAAATC                                  |
| oAT27         | TATGTGTTTTGATAAAGGTCATTTG                                 |
| oAT28         | GTAC <u>CATATG</u> AAGTGGACAAAAAGAGTAATCCGTT              |
| oAT29         | ACTA <u>AAGCTT</u> GTCTCCTAAAGTTAATGTAATTTTTTTAATG        |
| oAT30         | GCCACTATGAAAGTGATGATGTTG                                  |
| oAT31         | ACCTGGCTCATAGTTACTTTGG                                    |
| oAT32         | GTAC <u>CATATG</u> GAGAAAATTTAACAGCCATTTCGATTCC           |
| oAT33         | ACTA <u>AAGCTT</u> ATTCATTGGATGGTATTTTTGATACAGA           |
| oAT34         | ATACAACAAACGACCAATAATG                                    |
| oAT35         | CATTATTGGTTCGTTTGTGTATACAGGCACTCGCTTTGGAAC                |
| oAT36         | CCCAATAATGACCGCAAATTT                                     |
| oAT37         | AATTTTTGCGGTCAATTATTGGGATGCAGGTTTTGAACAAGGATT             |
| oAT38         | GTAC <u>CATATG</u> AACAAACCAACGATTCTGC                    |
| oAT39         | ACTC <u>CTCGAG</u> TGGTTGTGCTGGTTGAGGAT                   |

\* Underlined sequences are restriction sites introduced in primers.



**Supplementary Table 5. Oligonucleotide primers used in this study (cont.)**

| <b>Primer</b> | <b>Sequence (5'-3')*</b>                                          |
|---------------|-------------------------------------------------------------------|
| oAT76         | GCAGATGTATTGGTAACTCTCTCA                                          |
| oAT77         | TCCTGCCTTTCCTCCCTCCATAGTATCACCCTCTACTAGGATAC                      |
| oAT78         | GAGAGCACAGATACGGCGCTAAGTTGTACCGAGAATTGGAAA                        |
| oAT79         | TCTCTGACTTGCTTGCTGAC                                              |
| oAT80         | GAGAGATTTGAGGGAAGATCACG                                           |
| oAT81         | ACTC <u>CTCGAG</u> AAAGGAGGTAAGAAAAATGAAGAATTTTAGAAGTATTTTACGGTAT |
| oAT82         | ACT <u>GGATCC</u> TTAATTAAATTGTCTTCTTATATCAACTTTTT                |
| oAT83         | ACTC <u>CTCGAG</u> AAAGGAGGTAAGAAAAATGAAAATTGAAAAGAAACATCTTTTGG   |
| oAT84         | ACT <u>GGATCC</u> CTAACGACTTCTTCTCAAAGGTA                         |
| oAT85         | CCTTTGTCTTTTCTATCGTGATTGAAGA                                      |
| oAT86         | CTGTATGAGCTTCTGGCAAATAACC                                         |
| oAT87         | CCACTATCACAAGGTATTACAAACG                                         |
| oAT88         | GAACATTATTCAAGTAAGCGTTCAC                                         |

\*Underlined sequences are restriction sites introduced in primers.

## Supplementary References

1. Sjodt, M. *et al.* Structure of the peptidoglycan polymerase RodA resolved by evolutionary coupling analysis. *Nature* **556**, 118–121 (2018).
2. Meeske, A. J. *et al.* SEDS proteins are a widespread family of bacterial cell wall polymerases. *Nature* **537**, 634–638 (2016).
3. Ovchinnikov, S. *et al.* Large-scale determination of previously unsolved protein structures using evolutionary information. *Elife* **4**, 1–25 (2015).
4. Larkin, M. A. *et al.* Clustal W and Clustal X version 2.0. *Bioinformatics* **23**, 2947–2948 (2007).
5. Nagasawa, H. *et al.* Determination of the cleavage site involved in C-terminal processing of penicillin-binding protein 3 of *Escherichia coli*. *J. Bacteriol.* **171**, 5890–5893 (1989).
6. Paintdakhi, A. *et al.* Oufiti: An integrated software package for high-accuracy, high-throughput quantitative microscopy analysis. *Mol. Microbiol.* **99**, 767–777 (2016).
7. Studier, F. W. & Moffatt, B. A. Use of bacteriophage T7 RNA polymerase to direct selective high-level expression of cloned genes. *J. Mol. Biol.* **189**, 113–130 (1986).
8. Miroux, B. & Walker, J. E. Over-production of proteins in *Escherichia coli*: Mutant hosts that allow synthesis of some membrane proteins and globular proteins at high levels. *J. Mol. Biol.* **260**, 289–298 (1996).
9. Kreiswirth, B. N. *et al.* The toxic shock syndrome exotoxin structural gene is not detectably transmitted by a prophage. *Nature* **305**, 709–712 (1983).
10. Lanie, J. A. *et al.* Genome sequence of Avery's virulent serotype 2 strain D39 of *Streptococcus pneumoniae* and comparison with that of unencapsulated laboratory strain R6. *J. Bacteriol.* **189**, 38–51 (2007).
11. Fenton, A. K., Mortaji, L. El, Lau, D. T. C., Rudner, D. Z. & Bernhardt, T. G. CozE is a member of the MreCD complex that directs cell elongation in *Streptococcus pneumoniae*. *Nat. Microbiol.* **2**, 16237 (2016).
12. Welsh, M. A. *et al.* Identification of a functionally unique family of penicillin-binding proteins. *J. Am. Chem. Soc.* **139**, 17727–17730 (2017).
13. Qiao, Y. *et al.* Detection of lipid-linked peptidoglycan precursors by exploiting an unexpected transpeptidase reaction. *J. Am. Chem. Soc.* **136**, 14678–14681 (2014).
14. Heaslet, H., Shaw, B., Mistry, A. & Miller, A. A. Characterization of the active site of *S. aureus* monofunctional glycosyltransferase (Mtg) by site-directed mutation and structural analysis of the protein complexed with moenomycin. *J. Struct. Biol.* **167**, 129–135 (2009).
15. Rebets, Y. *et al.* Moenomycin resistance mutations in *Staphylococcus aureus* reduce peptidoglycan chain length and cause aberrant cell division. *ACS Chem. Biol.* **9**, 459–467 (2014).
16. Liew, A. T. F. *et al.* A simple plasmid-based system that allows rapid generation of tightly controlled gene expression in *Staphylococcus aureus*. *Microbiology* **157**, 666–676 (2011).
17. Vvedenskaya, I. O. *et al.* Growth phase-dependent control of transcription start site selection and gene expression by nanoRNAs. *Genes Dev.* **26**, 1498–1507 (2012).
