# Supplementary material
Source: PubMed Central journal article supplement (PMC6430707)
Supplement: NIHMS1516141-supplement-2.pdf [file NIHMS1516141-supplement-2.pdf]

## Reporting Summary

Nature Research wishes to improve the reproducibility of the work that we publish. This form provides structure for consistency and transparency in reporting. For further information on Nature Research policies, see [Authors & Referees](#) and the [Editorial Policy Checklist](#).

### Statistical parameters

When statistical analyses are reported, confirm that the following items are present in the relevant location (e.g. figure legend, table legend, main text, or Methods section).

n/a Confirmed

- The exact sample size ( $n$ ) for each experimental group/condition, given as a discrete number and unit of measurement
- An indication of whether measurements were taken from distinct samples or whether the same sample was measured repeatedly
- The statistical test(s) used AND whether they are one- or two-sided  
*Only common tests should be described solely by name; describe more complex techniques in the Methods section.*
- A description of all covariates tested
- A description of any assumptions or corrections, such as tests of normality and adjustment for multiple comparisons
- A full description of the statistics including central tendency (e.g. means) or other basic estimates (e.g. regression coefficient) AND variation (e.g. standard deviation) or associated estimates of uncertainty (e.g. confidence intervals)
- For null hypothesis testing, the test statistic (e.g.  $F$ ,  $t$ ,  $r$ ) with confidence intervals, effect sizes, degrees of freedom and  $P$  value noted  
*Give  $P$  values as exact values whenever suitable.*
- For Bayesian analysis, information on the choice of priors and Markov chain Monte Carlo settings
- For hierarchical and complex designs, identification of the appropriate level for tests and full reporting of outcomes
- Estimates of effect sizes (e.g. Cohen's  $d$ , Pearson's  $r$ ), indicating how they were calculated
- Clearly defined error bars  
*State explicitly what error bars represent (e.g. SD, SE, CI)*

*Our web collection on [statistics for biologists](#) may be useful.*

### Software and code

Policy information about [availability of computer code](#)

Data collection

The following softwares were used for data collection: NIS-Elements AR (v. 4.30), MetaMorph (v. 7.10), MassHunter Workstation Software (v. B.05.01) and Image Studio (v. 4.0).

Data analysis

The following softwares and programs were used for data analysis: NIS-Elements AR (v. 4.30), MetaMorph (v. 7.10), MassHunter Workstation Software (v. B.06.00), Image Studio (v. 4.0), ImageJ (v. 1.52e), Oufiti (v. 1.0), GraphPad Prism (v. 7.0d), Microsoft Excel for Mac (v. 15.33), MODELLER (v 9.2), SWISS-MODEL (v. 1.0), Clustal X (v. 2.1) and Phobius (v. 1.0).

For manuscripts utilizing custom algorithms or software that are central to the research but not yet described in published literature, software must be made available to editors/reviewers upon request. We strongly encourage code deposition in a community repository (e.g. GitHub). See the Nature Research [guidelines for submitting code & software](#) for further information.

## Data

Policy information about [availability of data](#)

All manuscripts must include a [data availability statement](#). This statement should provide the following information, where applicable:

- Accession codes, unique identifiers, or web links for publicly available datasets
- A list of figures that have associated raw data
- A description of any restrictions on data availability

All data generated or analyzed during this study are available upon request.

## Field-specific reporting

Please select the best fit for your research. If you are not sure, read the appropriate sections before making your selection.

Life sciences       Behavioural & social sciences       Ecological, evolutionary & environmental sciences

For a reference copy of the document with all sections, see [nature.com/authors/policies/ReportingSummary-flat.pdf](https://www.nature.com/authors/policies/ReportingSummary-flat.pdf)

## Life sciences study design

All studies must disclose on these points even when the disclosure is negative.

Sample size      Sample size was chosen based on historical data. No statistical methods were used to predetermine sample size.

Data exclusions      No data was excluded.

Replication      All experiments were successfully replicated in-house. Number of replications for each experiment is listed in the figure legends.

Randomization      Samples were allocated in groups according to their genetic background and treatment used when required.

Blinding      Investigators were not blinded to group allocation during the experiments or to the outcome assessment.

## Reporting for specific materials, systems and methods

### Materials & experimental systems

n/a      Involved in the study

Unique biological materials

Antibodies

Eukaryotic cell lines

Palaeontology

Animals and other organisms

Human research participants

### Methods

n/a      Involved in the study

ChIP-seq

Flow cytometry

MRI-based neuroimaging

## Unique biological materials

Policy information about [availability of materials](#)

Obtaining unique materials      All bacterial strains and plasmids generated in this study are listed in the supplementary information and are available from the corresponding authors upon request.
